# Supplementary material for: Electrospinning vs. Electro-Assisted Solution Blow Spinning for Fabrication of Fibrous Scaffolds for Tissue Engineering
Source: MDPI journal article supplement (doi:10.3390/polym14235254), 2022-12-01
Supplement: s1 [file s1]

## Supplementary Materials

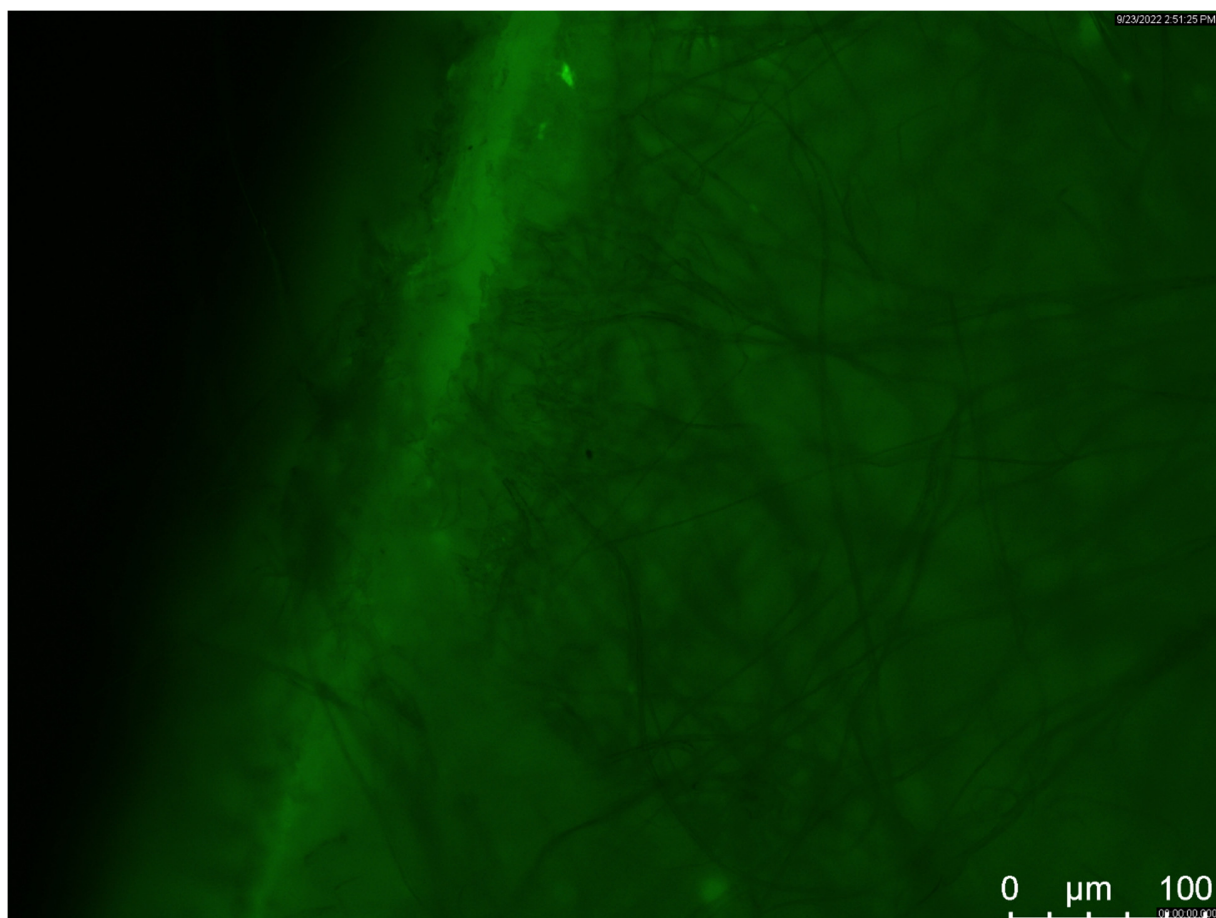

**Figure S1.** Fluorescent micrograph of EA-SBS-formed fibrous sample stained with fluorescein isothiocyanate (FITC).
